# Supplementary material for: The mito-QC Reporter for Quantitative Mitophagy Assessment in Primary Retinal Ganglion Cells and Experimental Glaucoma Models
Source: MDPI journal article supplement (doi:10.3390/ijms21051882), 2020-03-10
Supplement: s1 [file s1]

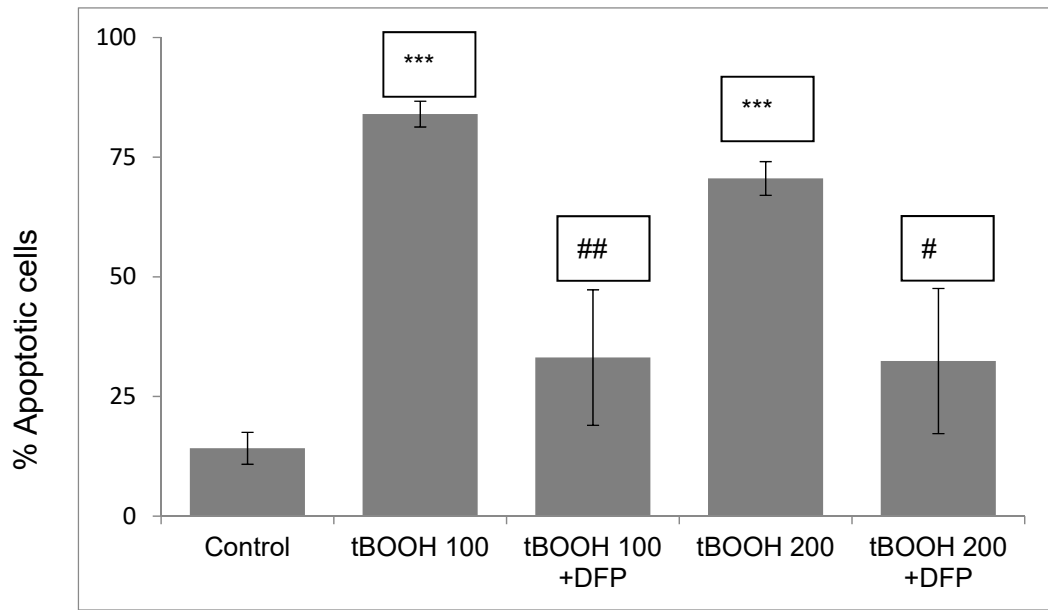

**Supplementary Figure 1:** ARPE19 *mito*-QC cells were incubated with the indicated doses of tBOOH with or without the presence 0.25 mM DFP for 24h. Cells were fixed and stained for anti-caspase-3. The % of activated caspase-3 apoptotic cells is displayed. \*\*\*  $p < 0.001$  vs. control, #  $p < 0.05$  vs. treatment, ##  $p < 0.01$  vs. treatment.

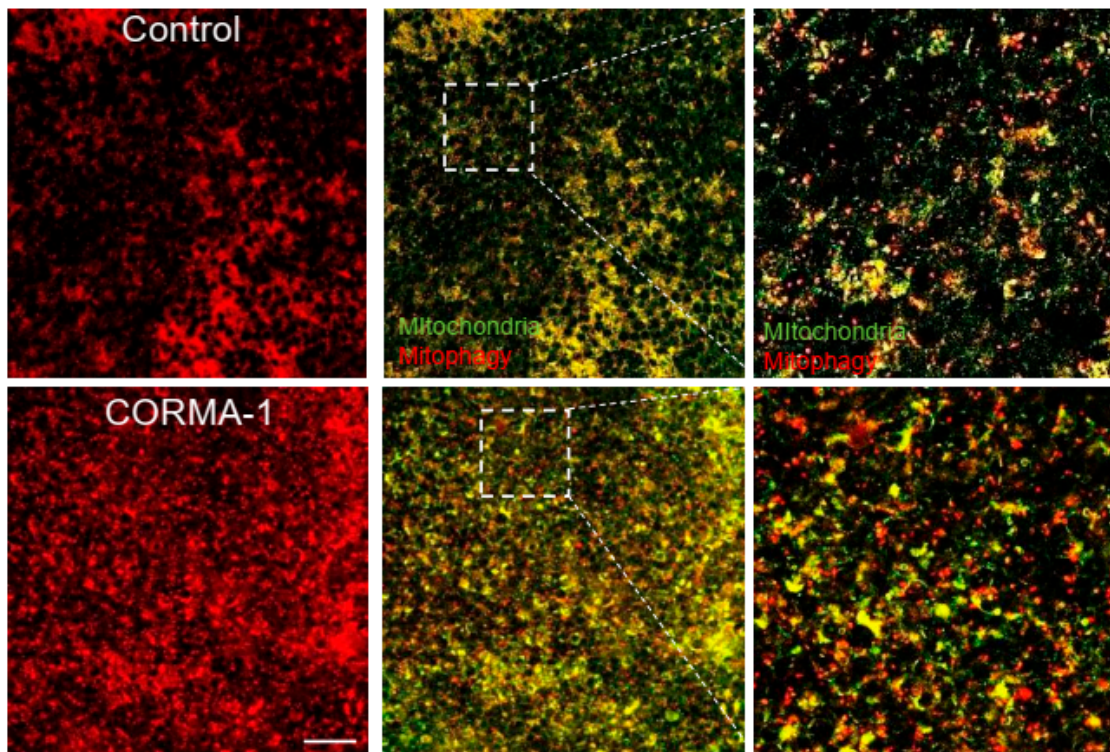

**Supplementary Figure 2:** Mitophagy of the ONL of retinal *ex vivo* explants cultured with CORMA-1 was assessed. The pictures show exemplary DAPI pictures as well as the red only channel, and an overlay of the red and green channel; highlighting the red puncta in a magnification, scale bar 10  $\mu\text{m}$ .
